# Supplementary material for: VEGF Detection via Simplified FLISA Using a 3D Microfluidic Disk Platform
Source: MDPI journal article supplement (doi:10.3390/bios11080270), 2021-08-11
Supplement: s1 [file s1]

## Supplementary Materials

# VEGF Detection via Simplified FLISA Using a 3D Microfluidic Disk Platform

Dong Hee Kang <sup>1</sup>, Na Kyong Kim <sup>1</sup>, Sang-Woo Park <sup>2,\*</sup> and Hyun Wook Kang <sup>1,\*</sup>

<sup>1</sup> Department of Mechanical Engineering, Chonnam National University, 77 Youngbong-ro, Buk-Gu, Gwangju 61186, Korea; kdh05010@gmail.com (D.H.K.); naky0607@gmail.com (N.K.K.)

<sup>2</sup> Department of Ophthalmology, Chonnam National University Medical School and Hospital, Baekseo-ro, Dong-Gu, Gwangju 61469, Korea

\* Correspondence: exo70@naver.com (S.-W.P.); kanghw@chonnam.ac.kr (H.W.K.); Tel.: +82-62-530-1662; (H.W.K.) Fax: +82-62-560-1689 (H.W.K.)

**Fig. S1** SEM images of microstructure (designed diameter (D) =500, 250, 200, and 100  $\mu\text{m}$ ) on 3D printed surface fabricated in the (a–d) vertical and (e–h) lateral directions to show resolution of stereolithography apparatus.

**Fig. S2** (a) Top view of 3D-printed block. (b) Isometric view and (c) sectional view of the 3D-printed block.

**Fig. S3** Angular velocity of disk with respect to time for the mixing cycle during incubation and the bead washing process.

**Citation:** Kang, D.H.; Kim, N.K.; Park, S.-W.; Kang, H.W. VEGF Detection via Simplified FLISA Using a 3D Microfluidic Disk Platform. *Biosensors* **2021**, *11*, x. <https://doi.org/10.3390/xxxxx>

Received: 2 August 2021

Accepted: 6 August 2021

Published: 11 August 2021

**Publisher's Note:** MDPI stays neutral with regard to jurisdictional claims in published maps and institutional affiliations.

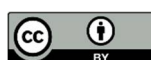

**Copyright:** © 2021 by the authors. Submitted for possible open access publication under the terms and conditions of the Creative Commons Attribution (CC BY) license (<http://creativecommons.org/licenses/by/4.0/>).

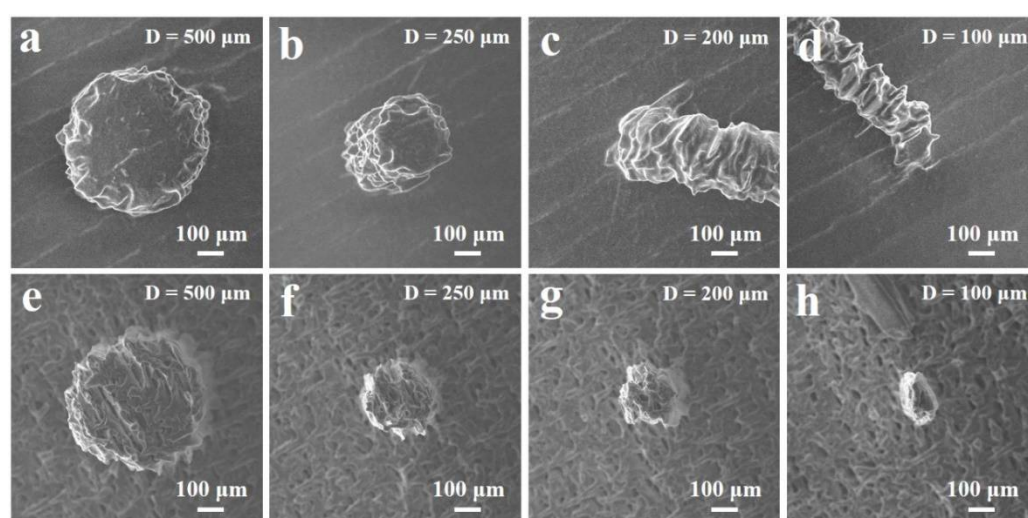

**Fig. S1** SEM images of microstructure (designed diameter (D) =500, 250, 200, and 100  $\mu\text{m}$ ) on 3D printed surface fabricated in the (a–d) vertical and (e–h) lateral directions to show resolution of stereolithography apparatus.

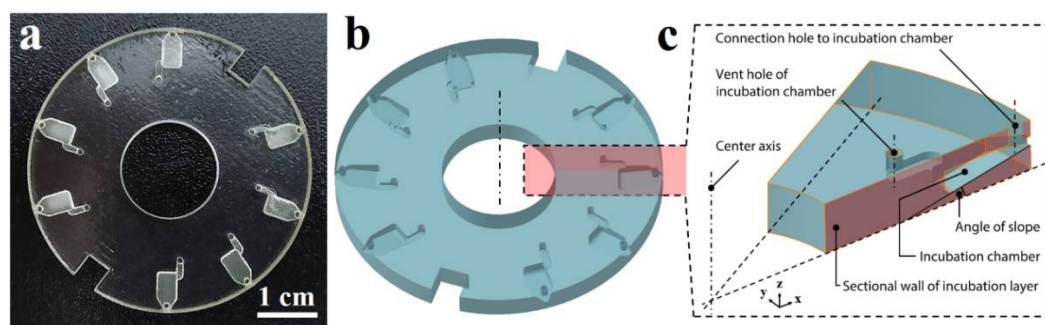

Fig. S2 (a) Top view of 3D-printed block. (b) isometric view and (c) sectional view of the 3D-printed block.

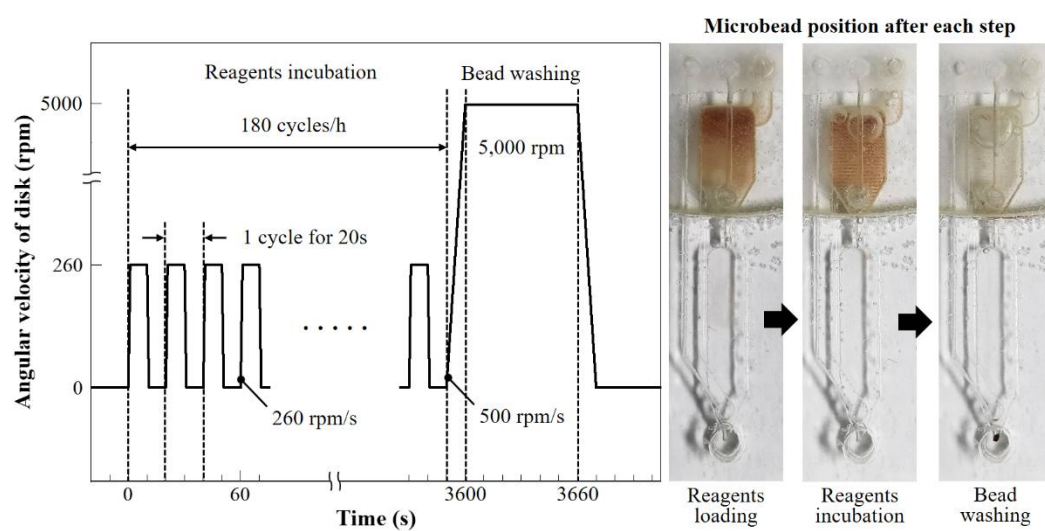

Fig. S3 Angular velocity of disk with respect to time for the mixing cycle during incubation and the bead washing process. The microbead position after each step (reagent loading, reagent incubation, and bead washing).
